# Supplementary material for: Genome-wide screening and immune landscape suggest a potential-m6A-related lncRNA risk signature for predicting prognosis of melanoma
Source: PubMed Central journal article supplement — Ann Transl Med. 2022 Mar;10(5):241. doi: 10.21037/atm-21-4402 (PMC8987876; doi:10.21037/atm-21-4402), 2022-03
Supplement: atm-10-05-241-supplementary.pdf [file atm-10-05-241-supplementary.pdf]

## Supplementary

**Table S1** The list of m6a-related genes

| Gene      | Type    |
|-----------|---------|
| METTL3    | writers |
| METTL14   | writers |
| METTL16   | writers |
| WTAP      | writers |
| VIRMA     | writers |
| ZC3H13    | writers |
| RBM15     | writers |
| RBM15B    | writers |
| YTHDC1    | readers |
| YTHDC2    | readers |
| YTHDF1    | readers |
| YTHDF2    | readers |
| YTHDF3    | readers |
| HNRNPC    | readers |
| FMR1      | readers |
| LRPPRC    | readers |
| HNRNPA2B1 | readers |
| IGF2BP1   | readers |
| IGF2BP2   | readers |
| IGF2BP3   | readers |
| RBMX      | readers |
| FTO       | erasers |
| ALKBH5    | erasers |

**Table S2** The list of 234 potential-m6A-related lncRNAs

| ID         |
|------------|
| AC084824.5 |
| SNHG10     |
| AC006449.2 |
| LENG8-AS1  |
| RAD51-AS1  |
| AL022328.2 |
| AC127024.4 |
| AC084036.1 |
| AC009948.1 |
| AL358472.2 |
| AC093157.1 |
| AC125257.1 |
| AC095057.3 |
| OTUD6B-AS1 |
| AL513534.1 |
| AC009318.2 |
| AC010761.1 |
| AL590705.3 |
| LINC02035  |
| AL365203.2 |
| AC132192.2 |
| AL135999.1 |
| AC007938.3 |
| AC138028.4 |
| AC007541.1 |
| AP006621.2 |
| AL365330.1 |
| AC093620.1 |
| NUTM2A-AS1 |
| HCG11      |
| AC120053.1 |
| EBLN3P     |
| SNHG20     |
| AC093726.2 |
| NIFK-AS1   |
| AP003352.1 |

**Table S2** (continued)

**Table S2** (continued)

| ID           |
|--------------|
| SLC25A25-AS1 |
| TMEM147-AS1  |
| HCG18        |
| AC092171.4   |
| AL355488.1   |
| LINC01945    |
| AC008124.1   |
| SPRY4-AS1    |
| LINC00909    |
| HOTAIRM1     |
| AL035563.1   |
| AL359504.2   |
| WAC-AS1      |
| AC010542.5   |
| AC012360.3   |
| AC005034.3   |
| AP003392.1   |
| LINC01560    |
| APTR         |
| RAMP2-AS1    |
| GAS5-AS1     |
| AL122035.1   |
| AL132989.1   |
| DLEU2        |
| AC093726.1   |
| RHPN1-AS1    |
| GARS-DT      |
| AC012467.2   |
| AC007566.1   |
| AC093484.4   |
| AC024060.1   |
| AL050341.2   |
| LINC00641    |
| FGD5-AS1     |
| AC079684.1   |
| PTOV1-AS2    |

**Table S2** (continued)**Table S2** (continued)

| ID           |
|--------------|
| ANKRD10-IT1  |
| MALAT1       |
| MIR503HG     |
| AC007406.5   |
| AC127502.2   |
| AC027031.2   |
| AC060780.1   |
| LINC01355    |
| CASC15       |
| Z83843.1     |
| AC004908.2   |
| CRNDE        |
| OIP5-AS1     |
| AC090589.3   |
| AC087481.3   |
| ADNP-AS1     |
| EIF3J-DT     |
| RPARP-AS1    |
| AC008735.2   |
| AC009113.1   |
| SNHG1        |
| AL136295.7   |
| AC074117.1   |
| AC139795.2   |
| MAPKAPK5-AS1 |
| MHENCN       |
| AC008669.1   |
| SNHG12       |
| AC009812.4   |
| ATP2B1-AS1   |
| ZNF674-AS1   |
| AP001469.3   |
| AC093673.1   |
| THUMP3-AS1   |
| AC139887.2   |
| NCK1-DT      |

**Table S2** (continued)

**Table S2** (continued)

| ID         |
|------------|
| NNT-AS1    |
| AC073842.2 |
| THCAT158   |
| PSPC1-AS2  |
| AC010834.3 |
| MAGI2-AS3  |
| AC080013.4 |
| SP2-AS1    |
| AC098484.1 |
| AL365361.1 |
| LINC00174  |
| AC002553.2 |
| AC007038.2 |
| AC093227.1 |
| TMCC1-AS1  |
| SDCBP2-AS1 |
| SNHG16     |
| AC015911.3 |
| AC092953.2 |
| NORAD      |
| ZFPM2-AS1  |
| AC004908.1 |
| AC083799.1 |
| CCDC18-AS1 |
| LINC01176  |
| AC009118.3 |
| DICER1-AS1 |
| AC012615.1 |
| AC022150.2 |
| AL049840.1 |
| AC010326.3 |
| AC015871.3 |
| AC010883.1 |
| AC104083.1 |
| AC090559.1 |
| AL139089.1 |

**Table S2** (continued)**Table S2** (continued)

| ID          |
|-------------|
| AL139287.1  |
| AC245060.2  |
| AC090198.1  |
| INE1        |
| AC008074.2  |
| AL354733.3  |
| LRRC75A-AS1 |
| PSMA3-AS1   |
| AL928654.2  |
| AC011477.3  |
| AC011451.1  |
| AL080317.1  |
| ZNF528-AS1  |
| GAS5        |
| SCAMP1-AS1  |
| TRAM2-AS1   |
| C5orf56     |
| AC064807.1  |
| CPB2-AS1    |
| SNHG21      |
| JPX         |
| AC099850.3  |
| AC004253.1  |
| AC108010.1  |
| AC084824.4  |
| AL390728.6  |
| SNHG4       |
| CCNT2-AS1   |
| AC009120.2  |
| AC026401.3  |
| LINC01578   |
| AC011477.2  |
| AL450384.2  |
| AC018647.2  |
| AL133243.2  |
| AC021078.1  |

**Table S2** (continued)

**Table S2** (continued)

| ID             |
|----------------|
| AL358472.3     |
| ARMCX5-GPRASP2 |
| AC019131.2     |
| AL035587.1     |
| AC005034.5     |
| AC008393.1     |
| AC093297.2     |
| AC084018.1     |
| PWAR6          |
| AC018690.1     |
| DHRS4-AS1      |
| AL133371.2     |
| AL136304.1     |
| AC005332.6     |
| ASH1L-AS1      |
| AC004918.1     |
| AL109811.3     |
| AC004148.2     |
| DLEU1          |
| TMEM161B-AS1   |
| AC002550.2     |
| AC005046.1     |
| AC092747.4     |
| UBR5-AS1       |
| AL359076.1     |
| AC132872.3     |
| AC116914.2     |
| AC064875.1     |
| AC005288.1     |
| LINC01004      |
| CARD8-AS1      |
| AC027097.1     |
| USP46-AS1      |
| AC011450.1     |
| AP005482.3     |
| AC009283.1     |

**Table S2** (continued)**Table S2** (continued)

| ID         |
|------------|
| AC015849.3 |
| AC079807.1 |
| MIR600HG   |
| AC026271.3 |
| AC073046.1 |
| RUSC1-AS1  |
| AC127024.5 |
| AL590764.1 |
| SMIM25     |
| AL035461.2 |
| THAP9-AS1  |
| PAXIP1-AS2 |
| MSC-AS1    |
| AC000123.1 |
| AL121894.2 |
| AC005104.1 |
| Z97989.1   |
| AC018752.1 |

**Table S3** The list of 10 potential-m6A-related lncRNAs with the highest prognostic value

| Gene       | Coef      |
|------------|-----------|
| EBLN3P     | -0.032835 |
| SPRY4.AS1  | -0.296288 |
| WAC.AS1    | -0.029493 |
| AC093726.1 | -0.001603 |
| AC015911.3 | -0.280683 |
| AC083799.1 | -0.04498  |
| AC090559.1 | -0.006413 |
| C5orf56    | -0.22694  |
| AL133371.2 | -0.042645 |
| AC092747.4 | -0.038008 |

**A** Patients with FEMALE

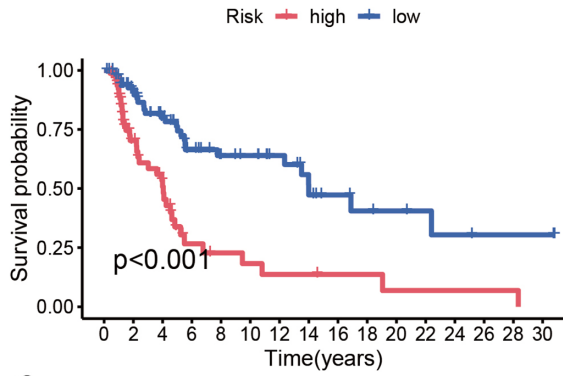

**B** Patients with MALE

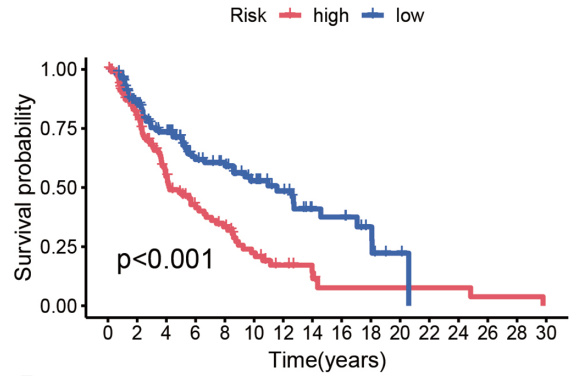

**C** Patients with M0

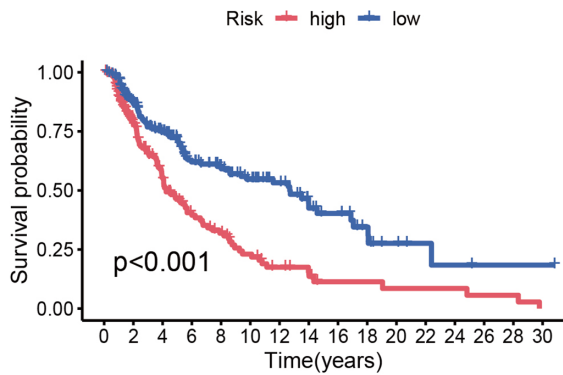

**D** Patients with M1

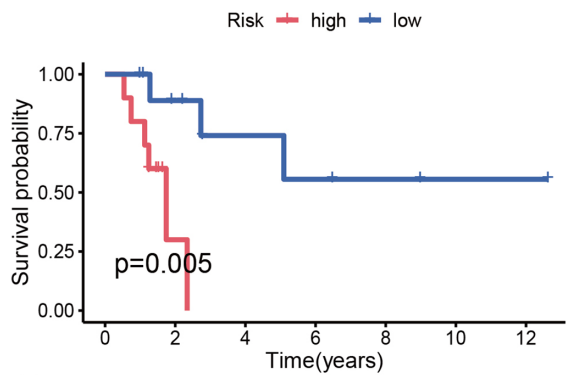

**E** Patients with N0

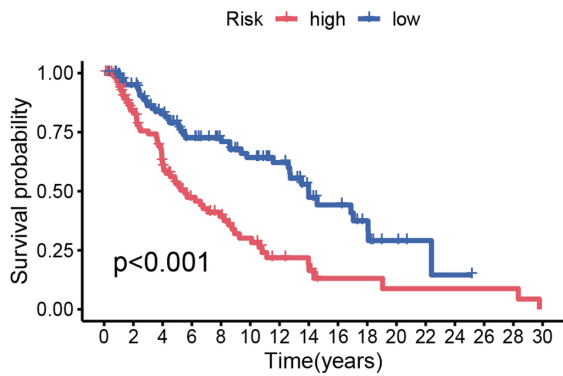

**F** Patients with N1-3

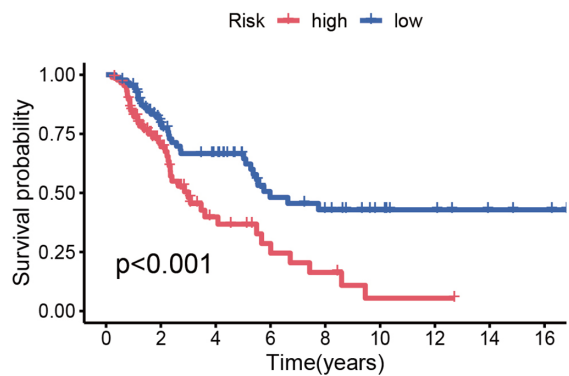

**G** Patients with Stage 0-II

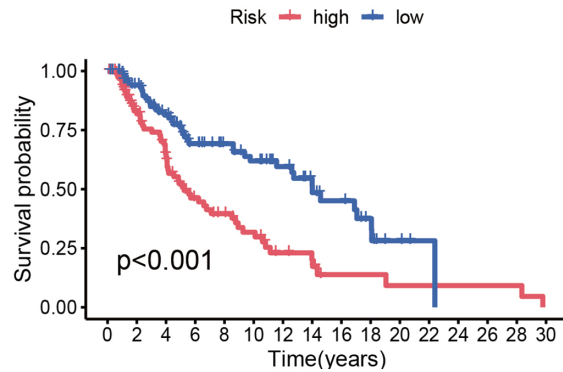

**H** Patients with Stage III-IV

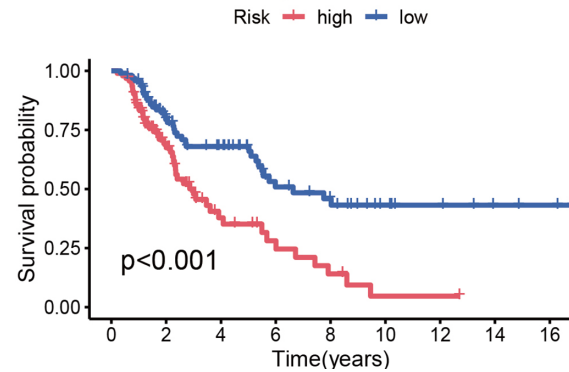

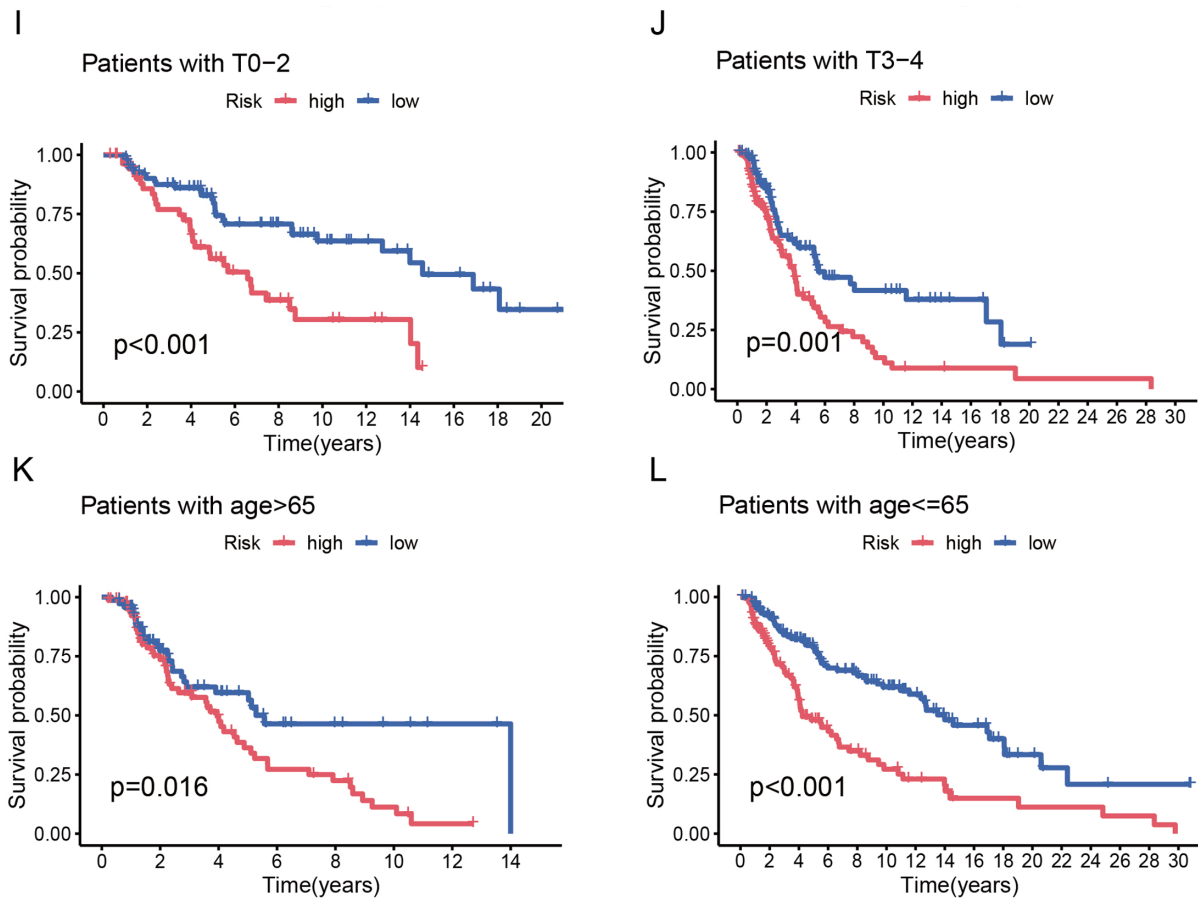

**Figure S1** Subgroup survival analysis. (A) Female subgroup. (B) Male subgroup. (C) M0 subgroup. (D) M1 subgroup. (E) N0 subgroup. (F) N1-3 subgroup. (G) Stage 0-II subgroup. (H) Stage III-IV subgroup. (I) T0-2 subgroup. (J) T3-4 subgroup. (K) Age >65 subgroup. (L) Age ≤65 subgroup.

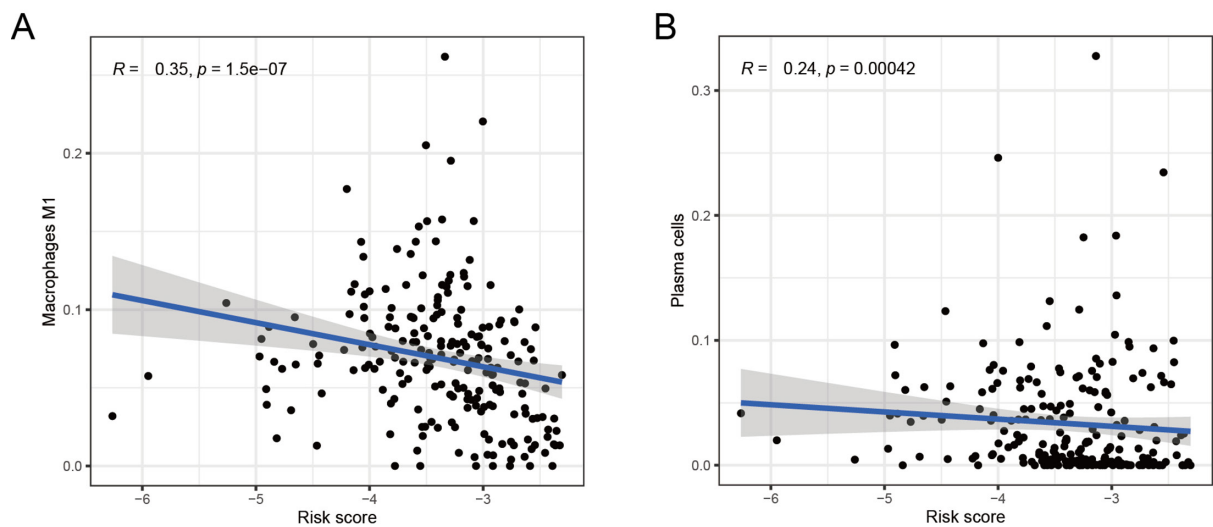

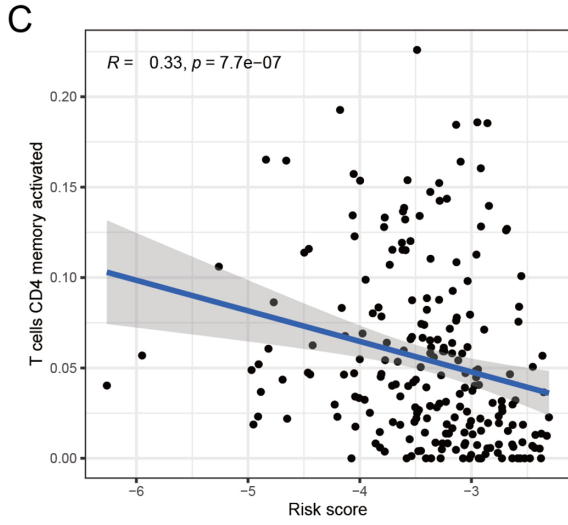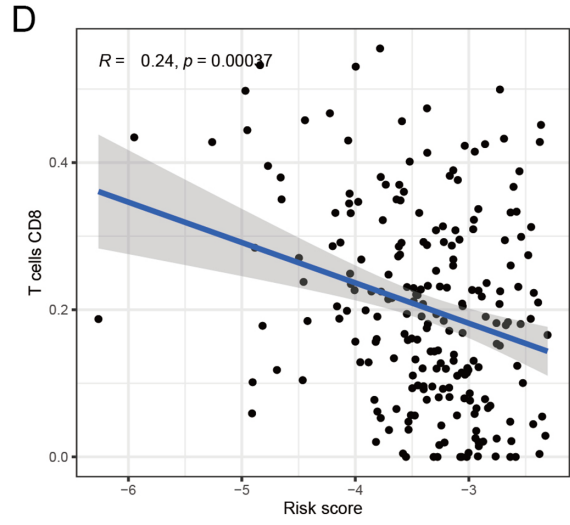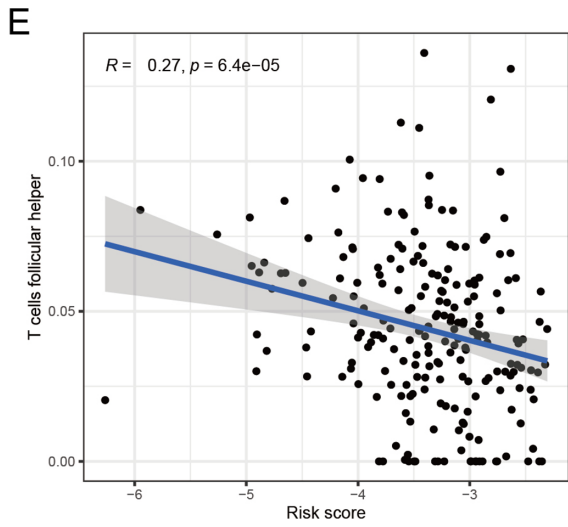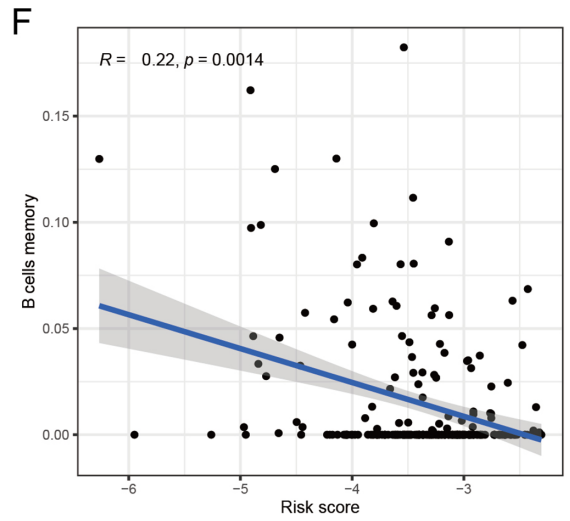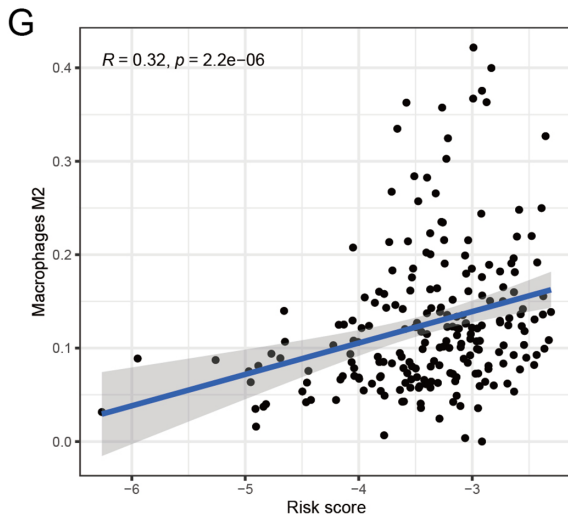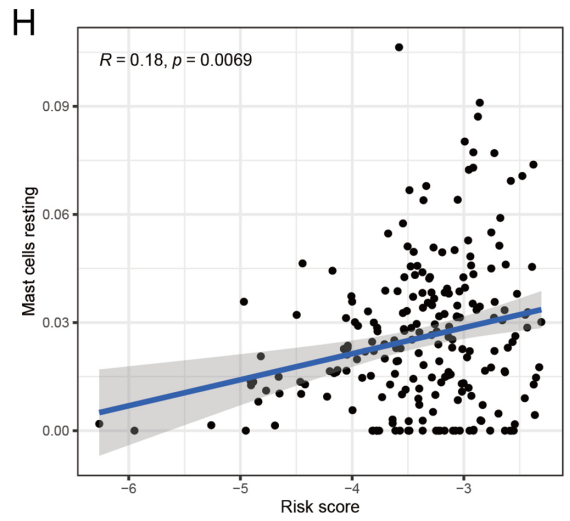

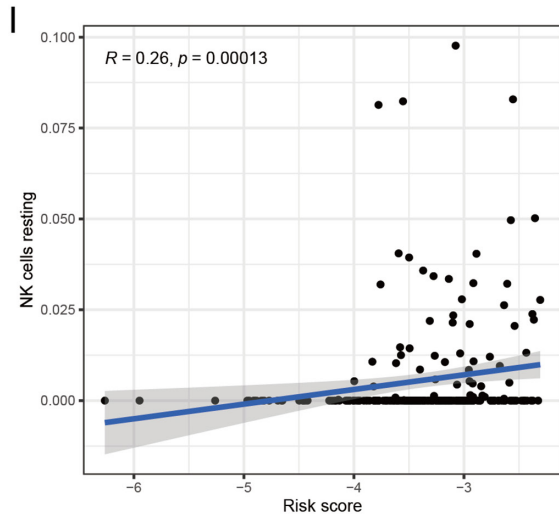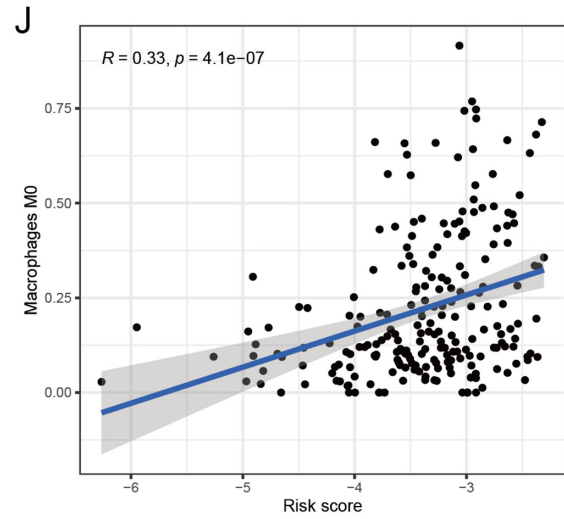

**Figure S2** Correlation analysis between the risk score and immune infiltration. (A) M1 macrophages. (B) Plasma cells. (C) Activated memory CD4 T cells. (D) CD8 T cells. (E) T follicular helper cells. (F) Memory B cells. (G) M2 macrophages. (H) Resting mast cells. (I) Resting NK cells. (J) M0 macrophages.
